# Supplementary material for: Sources of humic-like substances in the Pearl River Delta, China: positive matrix factorization analysis of PM 2.5 major components and source markers
Source: Copernicus journal article supplement (doi:10.5194/acp-15-1995-2015), 2015-02-24
Supplement: Supplementary file 1 [file acp-15-1995-2015-supplement.pdf]

Supplement of Atmos. Chem. Phys., 15, 1995–2008, 2015  
<http://www.atmos-chem-phys.net/15/1995/2015/>  
doi:10.5194/acp-15-1995-2015-supplement  
© Author(s) 2015. CC Attribution 3.0 License.

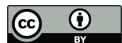

*Supplement of*

**Sources of humic-like substances in the Pearl River Delta, China: positive matrix factorization analysis of PM<sub>2.5</sub> major components and source markers**

**B. Y. Kuang et al.**

*Correspondence to:* J. Z. Yu ([jian.yu@ust.hk](mailto:jian.yu@ust.hk))

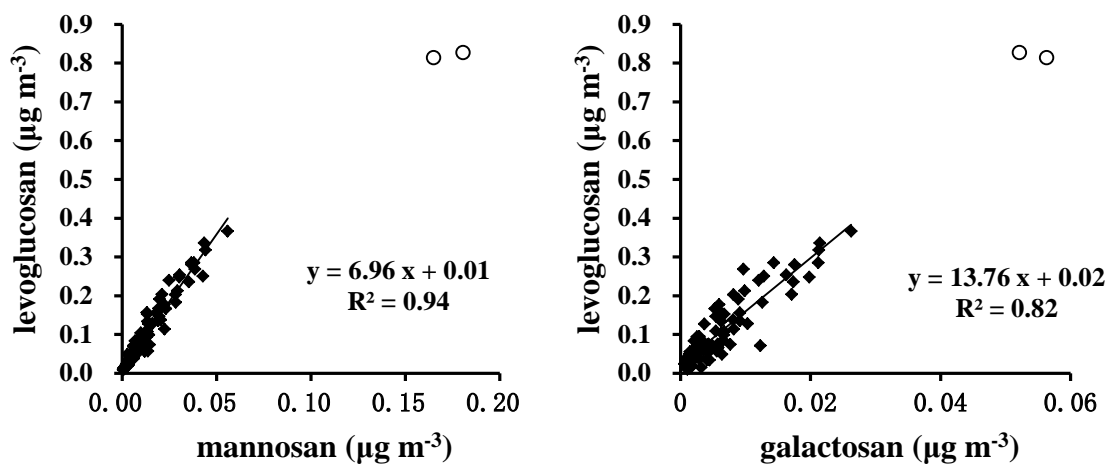

**Fig. S1** Relationship between levoglucosan and mannosan, galactosan.  
 The open circles represent the points which were not input into PMF (GZ Jan 26, NS Jan 26, because of extremely high levoglucosan)

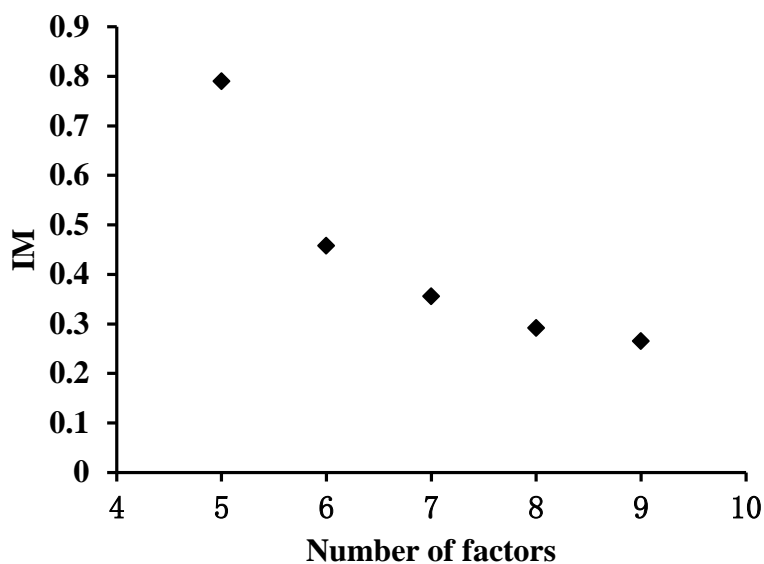

**Fig. S2** IM (maximum Individual column Mean) values of different factor numbers

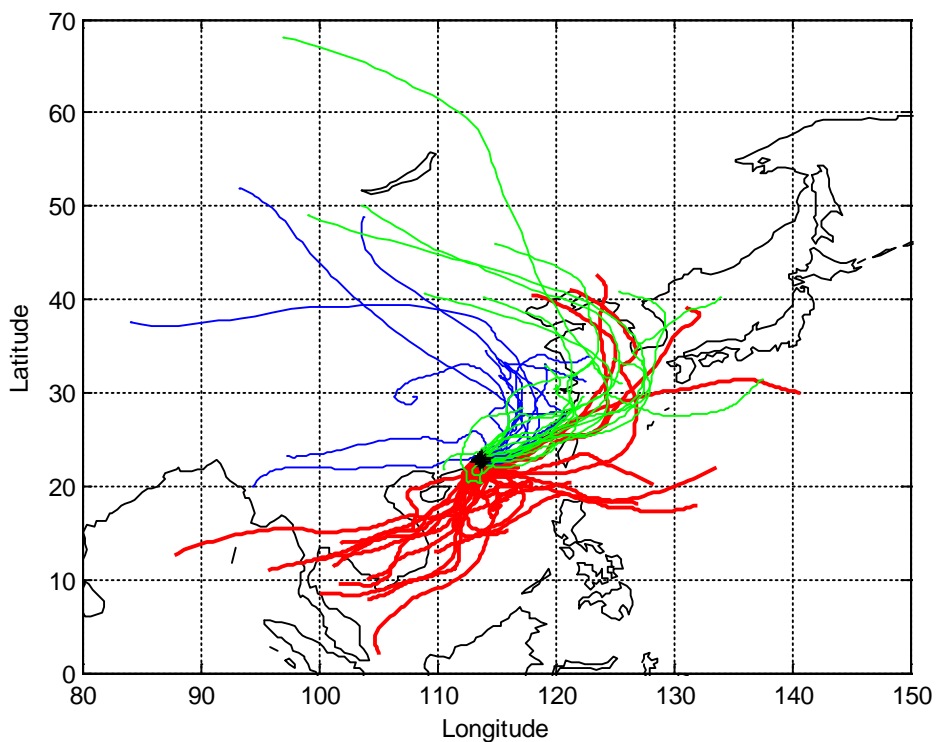

**Fig. S3** Back trajectories of all sampling days in 2009, with lines in red, green, and blue representing air mass back trajectories of marine, transitional, and continental origins, respectively.

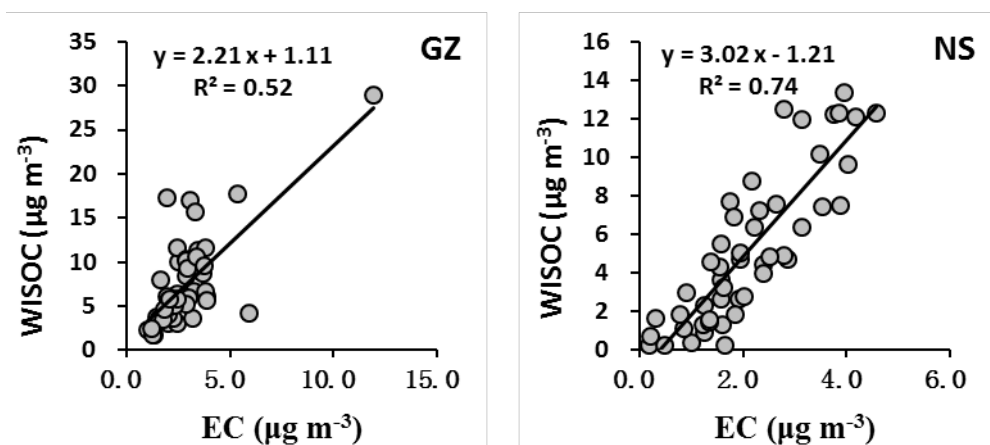

**Fig. S4** Correlation of water-insoluble OC (WISOC) with EC for the GZ and NS samples

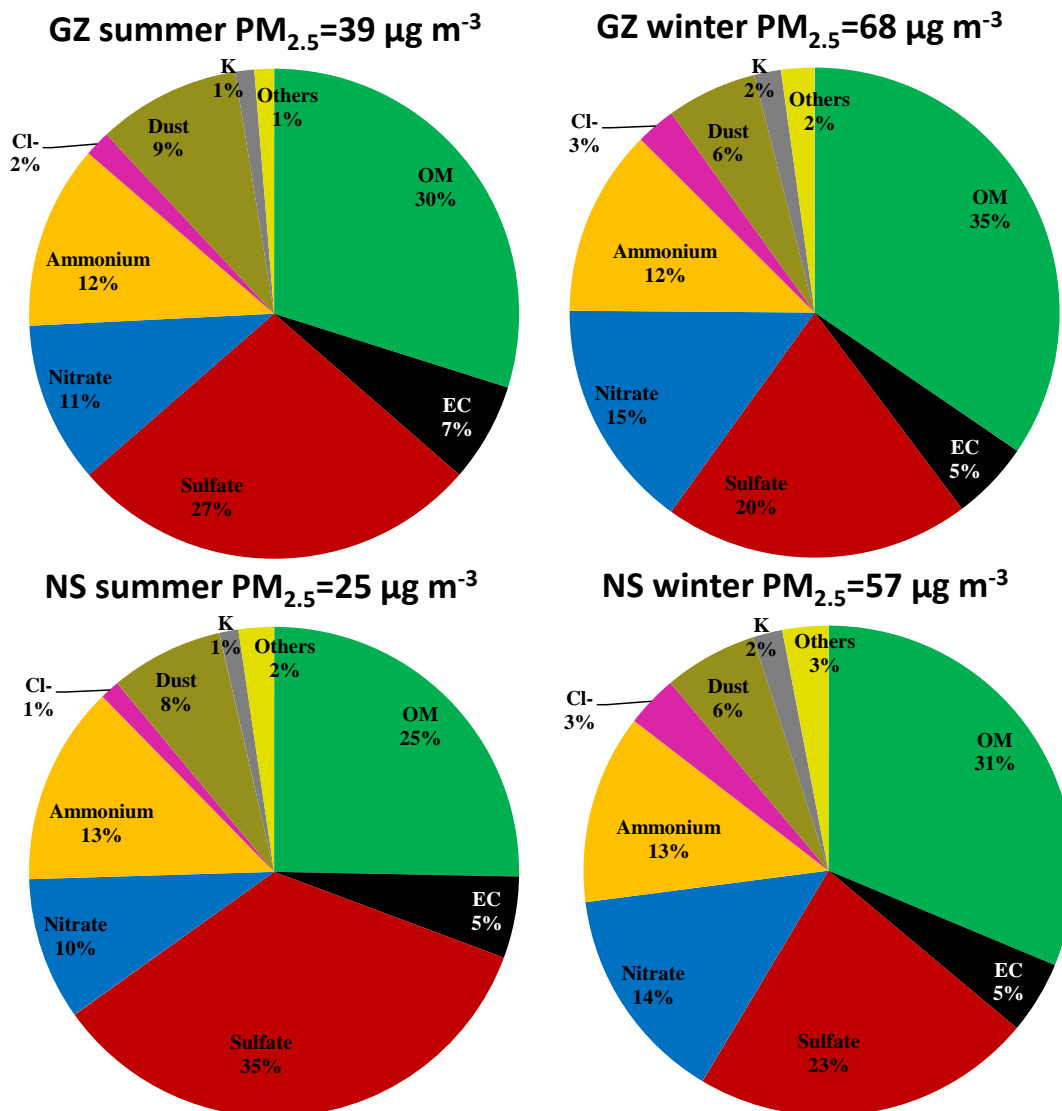

**Fig. S5** Average PM<sub>2.5</sub> concentration and composition in GZ and NS in summer and winter. Organic Matter (OM)=1.4\*OC. Dust= 2.2[Al] + 2.49[Si] + 1.63[Ca] +2.42[Fe] + 1.94[Ti] (Huang et al., 2014)

Reference:

Huang, X. H. H., Bian, Q., Ng, W. M., Louie, P. K. K., and Yu, J. Z.: Characterization of PM<sub>2.5</sub> major components and source investigation in suburban Hong Kong: a one year monitoring study, *Aerosol Air Quality Research*, 14, 237-250, doi:10.4209/aaqr.2013.01.0020, 2014.

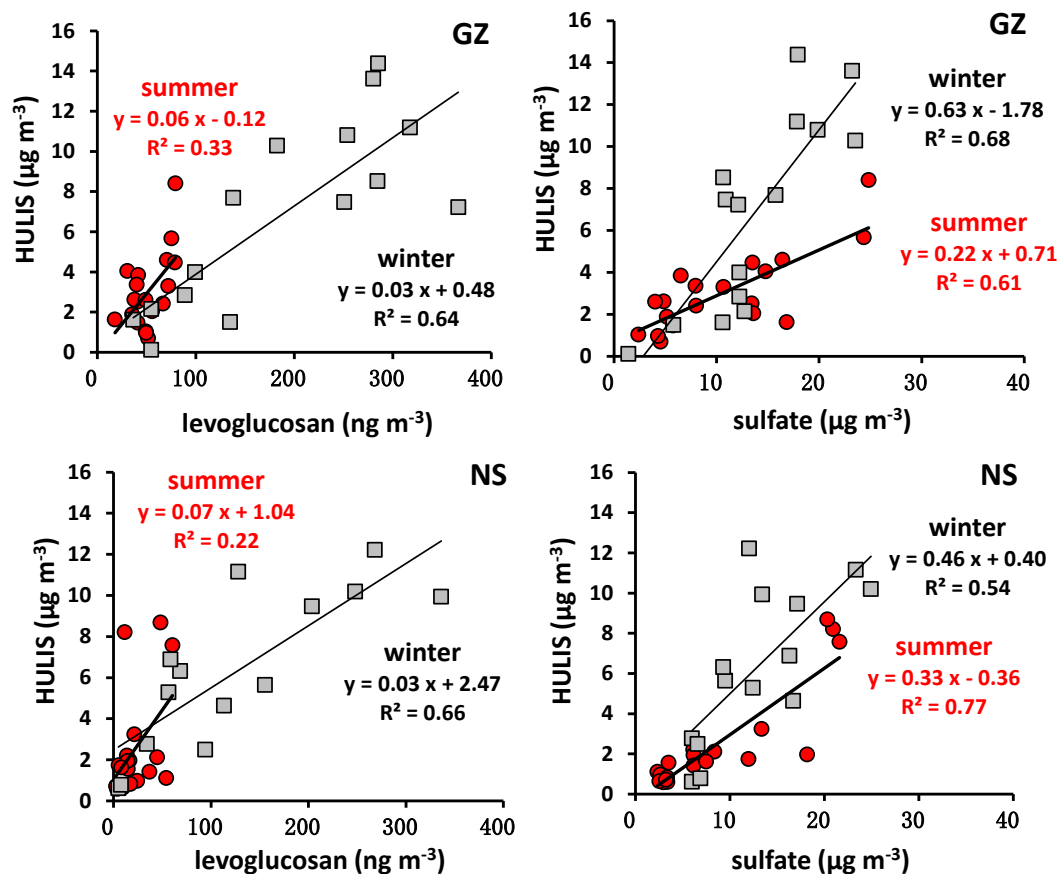

**Fig. S6** Correlations of HULIS with levoglucosan and sulfate in summer and winter. The correlations of HULIS vs levoglucosan are much better in winter than in summer, consistent with PMF result that biomass burning source is more important in winter than summer. The correlations of HULIS vs sulfate are similar in winter and in summer, in agreement with the PMF result that secondary process is important in the whole year.

**Table S1.** Concentrations of PM<sub>2.5</sub>, WSOC and HULIS concentrations and influencing air mass origin on individual sampling days

|           | BT <sup>1</sup> | Guangzhou                              |                            |                            | Nansha                                 |                            |                            |
|-----------|-----------------|----------------------------------------|----------------------------|----------------------------|----------------------------------------|----------------------------|----------------------------|
|           |                 | PM <sub>2.5</sub><br>µg/m <sup>3</sup> | WSOC<br>µgC/m <sup>3</sup> | HULIS<br>µg/m <sup>3</sup> | PM <sub>2.5</sub><br>µg/m <sup>3</sup> | WSOC<br>µgC/m <sup>3</sup> | HULIS<br>µg/m <sup>3</sup> |
| 2-Jan-09  | C               | 52.3                                   | 6.16                       | 7.47                       | 70.0                                   | 6.53                       | 12.21                      |
| 20-Jan-09 | T               | 103.7                                  | 10.21                      | 13.61                      | 94.1                                   | 8.95                       | 11.16                      |
| 26-Jan-09 |                 | 46.6                                   | 5.93                       | 4.78                       | 67.5                                   | 6.85                       | 9.97                       |
| 1-Feb-09  | T               | 72.5                                   | 6.97                       | 8.52                       | 50.0                                   | 4.49                       | 5.64                       |
| 7-Feb-09  | C               | 126.3                                  | 9.92                       | 10.28                      | 81.4                                   | 7.40                       | 9.46                       |
| 13-Feb-09 | M               |                                        |                            |                            | 15.9                                   | 0.99                       | 0.62                       |
| 19-Feb-09 | M               | 66.6                                   | 3.52                       | 2.15                       | 30.3                                   | 2.40                       | 2.77                       |
| 25-Feb-09 | M               | 33.3                                   | 1.73                       | 1.61                       | 24.0                                   | 1.39                       | 0.78                       |
| 3-Mar-09  | T               | 32.3                                   | 3.30                       | 2.94                       | 57.4                                   | 4.66                       | 4.55                       |
| 9-Mar-09  | C               | 37.7                                   | 2.93                       | 3.15                       | 39.8                                   | 3.11                       | 3.76                       |
| 15-Mar-09 | C               | 70.6                                   | 5.99                       | 5.41                       | 53.5                                   | 5.91                       | 6.35                       |
| 27-Mar-09 | T               | 90.8                                   | 4.28                       | 4.40                       | 103.0                                  | 3.78                       | 4.93                       |
| 2-Apr-09  | T               | 92.4                                   | 5.73                       | 6.55                       | 69.3                                   | 4.41                       | 6.14                       |
| 15-Apr-09 | M               | 79.3                                   | 3.41                       | 2.39                       | 42.7                                   | 2.72                       | 3.16                       |
| 26-Apr-09 | C               | 110.3                                  | 4.77                       | 3.98                       | 66.0                                   | 3.03                       | 3.67                       |
| 8-May-09  | M               | 40.9                                   | 3.37                       | 2.53                       | 35.4                                   | 2.81                       | 3.24                       |
| 20-May-09 | M               | 19.2                                   | 1.51                       | 0.70                       | 3.8                                    | 1.20                       | 1.11                       |
| 26-May-09 | M               | 45.9                                   | 3.21                       | 2.04                       | 23.6                                   | 4.78                       | 2.11                       |
| 1-Jun-09  | T               | 74.6                                   | 8.84                       | 8.40                       | 52.9                                   | 6.06                       | 8.20                       |
| 7-Jun-09  | T               | 48.9                                   | 2.90                       | 1.63                       | 35.5                                   | 2.22                       | 1.97                       |
| 13-Jun-09 | M               | 57.8                                   | 3.94                       | 3.30                       | 15.2                                   | 1.78                       | 1.55                       |
| 19-Jun-09 | M               | 46.4                                   | 4.30                       | 4.05                       | 27.7                                   | 1.79                       | 1.74                       |
| 25-Jun-09 | M               | 29.5                                   | 1.95                       | 1.47                       | 11.1                                   | 1.20                       | 0.60                       |
| 1-Jul-09  | M               | 18.7                                   | 2.46                       | 1.88                       | 9.6                                    | 1.17                       | 0.59                       |
| 7-Jul-09  | M               | 26.9                                   | 3.57                       | 3.85                       | 18.7                                   | 2.08                       | 2.21                       |
| 13-Jul-09 | M               | 52.4                                   | 5.60                       | 4.60                       | 18.8                                   | 2.04                       | 1.94                       |
| 19-Jul-09 | M               | 13.6                                   | 1.80                       | 1.03                       | 10.7                                   | 1.17                       | 0.97                       |
| 25-Jul-09 | M               | 22.8                                   | 2.61                       | 2.62                       |                                        |                            |                            |
| 31-Jul-09 | M               | 20.8                                   | 2.58                       | 2.61                       | 11.1                                   | 1.20                       | 0.64                       |
| 6-Aug-09  | M               | 23.5                                   | 1.97                       | 0.97                       | 26.5                                   | 1.51                       | 1.42                       |
| 12-Aug-09 | M               | 35.0                                   | 2.35                       | 2.42                       | 13.9                                   | 1.26                       | 0.82                       |
| 14-Aug-09 | M               |                                        |                            |                            | 10.3                                   | 1.18                       | 0.71                       |
| 18-Aug-09 | M               | 32.4                                   | 3.33                       | 3.37                       | 20.7                                   | 1.59                       | 1.62                       |
| 24-Aug-09 | C               | 47.1                                   | 5.60                       | 4.47                       | 64.1                                   | 7.12                       | 8.68                       |
| 30-Aug-09 | M               | 85.3                                   | 5.78                       | 5.67                       | 68.6                                   | 5.83                       | 7.58                       |
| 5-Sep-09  | M               | 38.3                                   | 5.48                       | 6.96                       | 22.1                                   | 2.78                       | 3.35                       |
| 11-Sep-09 | M               | 37.1                                   | 3.27                       | 3.49                       | 36.6                                   | 2.44                       | 2.89                       |
| 17-Sep-09 | M               | 44.2                                   | 4.14                       | 3.14                       | 23.9                                   | 2.26                       | 2.03                       |
| 23-Sep-09 | C               | 37.5                                   | 3.70                       | 3.45                       | 48.6                                   | 4.55                       | 6.04                       |
| 29-Sep-09 | T               | 46.6                                   | 4.64                       | 3.43                       | 39.3                                   | 3.78                       | 4.42                       |
| 5-Oct-09  | T               | 44.6                                   | 5.20                       | 4.37                       | 59.8                                   | 6.43                       | 8.32                       |
| 11-Oct-09 | T               | 46.1                                   | 6.48                       | 5.05                       | 61.3                                   | 7.10                       | 9.27                       |
| 17-Oct-09 | C               | 77.3                                   | 8.40                       | 7.59                       | 69.9                                   | 8.14                       | 11.19                      |
| 23-Oct-09 | T               | 76.8                                   | 8.92                       | 8.15                       | 95.3                                   | 10.43                      | 14.47                      |
| 29-Oct-09 | T               | 104.2                                  | 9.23                       | 10.95                      |                                        |                            |                            |
| 4-Nov-09  | T               | 60.7                                   | 7.27                       | 7.23                       | 69.2                                   | 7.33                       | 9.93                       |
| 10-Nov-09 | M               | 45.7                                   | 4.17                       | 2.84                       |                                        |                            |                            |
| 16-Nov-09 | T               | 8.5                                    | 0.96                       | 0.12                       |                                        |                            |                            |
| 28-Nov-09 | T               | 131.9                                  | 10.71                      | 14.38                      | 47.6                                   | 4.62                       | 6.32                       |
| 4-Dec-09  | C               | 73.8                                   | 7.58                       | 10.80                      | 87.9                                   | 8.69                       | 10.19                      |
| 10-Dec-09 | C               | 75.7                                   | 5.92                       | 7.69                       | 71.3                                   | 4.16                       | 4.63                       |
| 16-Dec-09 | T               | 21.4                                   | 2.38                       | 1.50                       | 26.4                                   | 2.38                       | 2.49                       |
| 22-Dec-09 | C               | 102.8                                  | 9.02                       | 11.19                      | 81.9                                   | 6.41                       | 6.89                       |
| 28-Dec-09 | C               | 48.2                                   | 3.60                       | 3.99                       | 52.4                                   | 3.75                       | 5.28                       |

<sup>1</sup> M=marine; T=transitional; C=continental

**Table S2.** Coefficient of correlation ( $R^2$ ) between HULIS, WSOC\_h and all the species

|              | GZ,<br>HULIS<br>N=51 | NS,<br>HULIS<br>N=49 | GZ,<br>WSOC_h<br>N=51 | NS,<br>WSOC_h<br>N=49 |
|--------------|----------------------|----------------------|-----------------------|-----------------------|
| WSOC_h       | 0.41                 | 0.39                 | 1.00                  | 1.00                  |
| WISOC        | <b>0.64</b>          | <b>0.59</b>          | 0.20                  | 0.25                  |
| EC           | 0.39                 | 0.51                 | 0.12                  | 0.31                  |
| levoglucosan | <b>0.53</b>          | <b>0.53</b>          | 0.23                  | 0.24                  |
| mannosan     | <b>0.47</b>          | <b>0.42</b>          | 0.16                  | 0.14                  |
| galactosan   | <b>0.48</b>          | <b>0.42</b>          | 0.18                  | 0.22                  |
| norhopane    | 0.38                 | 0.19                 | 0.08                  | 0.11                  |
| hopane       | 0.31                 | 0.20                 | 0.05                  | 0.09                  |
| NH4+         | <b>0.55</b>          | <b>0.60</b>          | <b>0.44</b>           | <b>0.40</b>           |
| NO3-         | <b>0.47</b>          | <b>0.42</b>          | 0.26                  | 0.25                  |
| SO4=         | <b>0.49</b>          | <b>0.63</b>          | <b>0.56</b>           | 0.35                  |
| C2O4=        | <b>0.53</b>          | <b>0.33</b>          | <b>0.43</b>           | <b>0.40</b>           |
| Na+          | 0.11                 | 0.20                 | 0.07                  | 0.19                  |
| Mg2+         | 0.01                 | 0.07                 | 0.05                  | 0.06                  |
| Cl-          | 0.23                 | 0.12                 | 0.03                  | 0.10                  |
| Al           | 0.02                 | 0.22                 | 0.05                  | 0.10                  |
| Si           | 0.01                 | 0.14                 | 0.03                  | 0.07                  |
| K            | 0.52                 | 0.70                 | 0.40                  | 0.34                  |
| Ca           | 0.02                 | 0.28                 | 0.05                  | 0.16                  |
| Ti           | 0.01                 | 0.19                 | 0.03                  | 0.10                  |
| V            | 0.04                 | 0.01                 | 0.07                  | 0.06                  |
| Mn           | 0.18                 | 0.37                 | 0.12                  | 0.18                  |
| Fe           | 0.04                 | 0.26                 | 0.06                  | 0.11                  |
| Ni           | 0.07                 | 0.11                 | 0.06                  | 0.11                  |
| Zn           | <b>0.40</b>          | <b>0.52</b>          | 0.23                  | 0.22                  |
| Pb           | <b>0.43</b>          | <b>0.58</b>          | 0.28                  | 0.25                  |

**Table S3.** Average factor contributions to major PM<sub>2.5</sub> components for the 6-factor solution ( $\mu\text{g m}^{-3}$ )

| Factors                                                                  | GZ site     |             |       |             |             |                              | NS site     |             |      |             |             |                              |
|--------------------------------------------------------------------------|-------------|-------------|-------|-------------|-------------|------------------------------|-------------|-------------|------|-------------|-------------|------------------------------|
|                                                                          | WSOC_h      | EC          | OC    | sulfate     | nitrate     | NH <sub>4</sub> <sup>+</sup> | WSOC_h      | EC          | OC   | sulfate     | nitrate     | NH <sub>4</sub> <sup>+</sup> |
| F1: Dust                                                                 | 0.08        | 0.09        | 0.15  | 0.78        | 0           | 0.10                         | 0.06        | 0.07        | 0.11 | 0.59        | 0           | 0.08                         |
| F2: Cl <sup>-</sup> and NO <sub>3</sub> <sup>-</sup><br>dominated factor | 0           | 0.05        | 2.34  | 1.48        | <b>5.32</b> | <b>2.66</b>                  | 0           | 0.03        | 1.57 | 0.99        | <b>3.58</b> | <b>1.79</b>                  |
| F3: ship emissions and<br>sea salt aerosols                              | 0.32        | <b>0.53</b> | 1.29  | 2.30        | 0.31        | 0.79                         | <b>0.54</b> | <b>0.91</b> | 2.23 | 3.97        | 0.54        | 1.36                         |
| F4: Secondary process                                                    | <b>0.54</b> | 0.28        | 3.17  | <b>7.67</b> | 0.64        | <b>2.90</b>                  | <b>0.44</b> | 0.22        | 2.57 | <b>6.21</b> | 0.52        | <b>2.35</b>                  |
| F5: Biomass burning                                                      | <b>0.43</b> | <b>0.64</b> | 2.71  | 0           | 0.04        | 0                            | <b>0.33</b> | <b>0.49</b> | 2.06 | 0           | 0.03        | 0                            |
| F6: Vehicular emissions                                                  | <b>0.82</b> | <b>1.29</b> | 2.39  | 0.36        | 0.06        | 0                            | 0.19        | <b>0.30</b> | 0.56 | 0.09        | 0.01        | 0                            |
| Subtotal                                                                 | 2.19        | 2.88        | 12.05 | 12.60       | 6.37        | 6.46                         | 1.56        | 2.03        | 9.10 | 11.85       | 4.68        | 5.58                         |
| Observed conc.                                                           | 2.31        | 2.89        | 12.22 | 13.39       | 6.71        | 6.81                         | 1.46        | 2.12        | 9.13 | 12.15       | 4.85        | 5.55                         |
